# Supplementary material
Source: HighWire-hosted journal article supplement (https://erj.ersjournals.com/content/55/1/1901407)
Supplement: inline-supplementary-material-1 [file inline-supplementary-material-1.pdf]

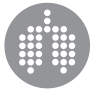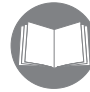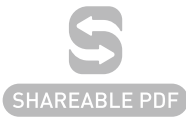

# ICS-formoterol reliever therapy stepwise treatment algorithm for adult asthma

Richard Beasley <sup>1,2</sup>, Irene Braithwaite <sup>1,2</sup>, Alex Semprini <sup>1,2</sup>,  
Ciléin Kearns <sup>1,2</sup>, Mark Weatherall <sup>2,3</sup>, Tim W. Harrison <sup>4</sup>, Alberto Papi <sup>5</sup>  
and Ian D. Pavord <sup>6</sup>

**Affiliations:** <sup>1</sup>Medical Research Institute of New Zealand, Wellington, New Zealand. <sup>2</sup>Capital and Coast District Health Board, Wellington, New Zealand. <sup>3</sup>University of Otago Wellington, Wellington, New Zealand. <sup>4</sup>Nottingham NIHR Biomedical Research Centre, University of Nottingham, Nottingham, UK. <sup>5</sup>Respiratory Medicine Unit, Dept of Medical Sciences, Università di Ferrara, Ferrara, Italy. <sup>6</sup>Oxford Respiratory NIHR BRC, Nuffield Dept of Medicine, University of Oxford, Oxford, UK.

**Correspondence:** Richard Beasley, Medical Research Institute of New Zealand, Private Bag 7902, Newtown, Wellington 6242, New Zealand. E-mail: richard.beasley@mri.nz.ac.nz

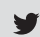

@ERSpublications

A practical “anti-inflammatory reliever therapy”-based algorithm based on the GINA 2019 update is presented, together with a prototype action plan to facilitate its implementation. <http://bit.ly/33C2s5u>

**Cite this article as:** Beasley R, Braithwaite I, Semprini A, *et al.* ICS-formoterol reliever therapy stepwise treatment algorithm for adult asthma. *Eur Respir J* 2020; 55: 1901407 [<https://doi.org/10.1183/13993003.01407-2019>].

This single-page version can be shared freely online.

A stepwise approach to the pharmacological treatment of asthma is a key feature of current asthma guidelines [1–4]. Through algorithms, treatment intensity is “stepped up” to obtain asthma control and reduce the risk of exacerbations, and “stepped down” after a period of prolonged control and absence of exacerbations. Traditional algorithms advocated short-acting  $\beta_2$ -agonist (SABA) reliever therapy for all levels of severity, initially as sole therapy at Step 1, together with maintenance “low dose” inhaled corticosteroids (ICS) at Step 2, with maintenance ICS/long-acting  $\beta_2$ -agonist (LABA) at “low”, “moderate” or “high” doses at Steps 3 and 4, and finally with “add-on” therapies at Step 5.
